# Supplementary material
Source: publisher figshare collection journal article supplement (https://gsajournals.figshare.com/ndownloader/files/30745009)
Supplement: Supplementary file 1 [file 30745009]

## Sheet: XenAlignmentStats
	MB44_I	MB44_II	MB44_III	FB46_I	FB46_II	FB46_III	HB46_I	HB46_II	HB46_III	MB46_I	MB46_II	MB46_III	SC46_I	SC46_II	SC46_III	FB49_I	FB49_II	HB49_I	HB49_II	MB49_I	MB49_II	MB55_I	MB55_II	MB55_III	MB61_I	MB61_II	MB61_III	MB66_I
Mapping speed, Million of reads per hour |	30.57	30.94	30.02	28.69	29.96	24.46	19.9	29.73	25.4	33.29	31.98	32.75	13.12	13.54	12.26	26.7	27.81	27.38	27.39	31.59	27.31	33.01	26.54	22.9	28.82	31.74	33.42	31.85
Number of input reads |	11446134	17592659	17246704	11685106	15762251	15197361	11640930	15658986	14428245	17136312	15242400	16727532	13371716	14659502	12925190	14930735	19322921	12823940	16847431	14932802	26471991	16268935	19577254	18265379	16528889	12518853	15207134	12341689
Average input read length |	202	202	202	202	202	202	202	202	202	202	202	202	202	202	202	202	202	202	202	202	202	202	202	202	202	202	202	202
UNIQUE READS:
Uniquely mapped reads number |	10110772	15570224	15183622	10257123	13879142	12361279	10029160	13684239	11780844	14952781	13273086	14563995	11547162	12796621	10809173	11988620	15641077	10395028	13597299	12715393	21455512	14129366	16983848	15928872	14165586	10845928	13310322	10622024
Uniquely mapped reads % |	0.8833	0.885	0.8804	0.8778	0.8805	0.8134	0.8615	0.8739	0.8165	0.8726	0.8708	0.8707	0.8636	0.8729	0.8363	0.8029	0.8095	0.8106	0.8071	0.8515	0.8105	0.8685	0.8675	0.8721	0.857	0.8664	0.8753	0.8607
Average mapped length |	197.67	197.77	197.17	197.21	197.28	192.8	196.99	197.36	192.96	197.43	197.24	197.24	197.07	197.46	194.46	192.33	193.25	193.09	192.15	196.17	193.13	196.96	196.67	196.83	197	197.41	197.32	196.84
Number of splices: Total |	5467158	8696960	7943717	5165255	7142091	2050177	5054610	7715205	2101382	8269737	7261522	8470319	5911295	6265442	2463912	1318253	1681090	1281205	1150838	5523024	3004150	6992468	7649439	7463412	6734879	5277271	6606675	4292536
Number of splices: Annotated (sjdb) |	5091891	8116948	7392260	4803779	6639489	1795162	4704884	7207471	1850237	7720238	6772431	7910006	5496370	5814720	2253522	1089821	1408671	1091468	924479	5110389	2587179	6489832	7074345	6903569	6223817	4870568	6094377	3931897
Number of splices: GT/AG |	5381613	8563691	7821050	5076919	7023413	1961341	4971447	7602814	2010340	8150867	7155264	8351845	5867659	6221119	2444083	1232710	1571285	1207556	1057589	5422455	2847790	6881888	7515191	7340021	6622500	5194018	6497556	4215568
Number of splices: GC/AG |	32705	52042	47809	33148	44837	15671	32492	46816	16391	49832	44109	50831	30254	30341	13870	11534	14129	10349	10360	33758	23468	42948	46170	45480	39484	31420	38013	24550
Number of splices: AT/AC |	6761	11250	10047	6441	9080	2896	6267	9252	2755	10629	8903	10746	6623	6881	2919	1850	2489	1651	1736	6876	4046	9229	9415	9225	8180	6553	7757	5245
Number of splices: Non-canonical |	46079	69977	64811	48747	64761	70269	44404	56323	71896	58409	53246	56897	6759	7101	3040	72159	93187	61649	81153	59935	128846	58403	78663	68686	64715	45280	63349	47173
Mismatch rate per base, % |	0.0056	0.0055	0.0057	0.0055	0.0055	0.0082	0.0056	0.0054	0.0083	0.0056	0.0056	0.0056	0.0056	0.0056	0.0076	0.0088	0.0085	0.0084	0.0088	0.0063	0.0083	0.006	0.0062	0.0059	0.0061	0.0055	0.0057	0.0059
Deletion rate per base |	0.0005	0.0004	0.0004	0.0005	0.0005	0.0006	0.0005	0.0004	0.0006	0.0004	0.0004	0.0004	0.0005	0.0005	0.0006	0.0006	0.0006	0.0006	0.0006	0.0005	0.0006	0.0005	0.0005	0.0004	0.0005	0.0004	0.0005	0.0005
Deletion average length |	2.49	2.47	2.47	2.48	2.47	2.53	2.45	2.43	2.52	2.47	2.46	2.45	2.47	2.48	2.56	2.52	2.55	2.55	2.5	2.48	2.51	2.52	2.49	2.48	2.52	2.45	2.52	2.47
Insertion rate per base |	0.0003	0.0003	0.0003	0.0003	0.0003	0.0004	0.0003	0.0003	0.0004	0.0003	0.0003	0.0003	0.0003	0.0003	0.0004	0.0004	0.0004	0.0004	0.0004	0.0003	0.0004	0.0003	0.0003	0.0003	0.0003	0.0003	0.0003	0.0003
Insertion average length |	2.34	2.33	2.33	2.31	2.31	2.21	2.27	2.33	2.24	2.34	2.32	2.32	2.31	2.3	2.27	2.19	2.26	2.26	2.18	2.29	2.2	2.34	2.33	2.35	2.33	2.32	2.4	2.28
MULTI-MAPPING READS:
Number of reads mapped to multiple loci |	263923	415182	463975	311302	400054	804120	361791	408915	750784	452088	443861	477865	415781	424895	598747	899784	1001979	669995	946971	468330	1371190	503649	550626	532542	563595	367373	408619	402084
% of reads mapped to multiple loci |	0.0231	0.0236	0.0269	0.0266	0.0254	0.0529	0.0311	0.0261	0.052	0.0264	0.0291	0.0286	0.0311	0.029	0.0463	0.0603	0.0519	0.0522	0.0562	0.0314	0.0518	0.031	0.0281	0.0292	0.0341	0.0293	0.0269	0.0326
Number of reads mapped to too many loci |	12183	17030	19286	13987	17352	96993	16642	14336	86207	17963	16197	15503	26853	64834	131595	110855	128573	85425	114931	31357	158508	26204	45099	31263	30391	21319	23388	29875
% of reads mapped to too many loci |	0.0011	0.001	0.0011	0.0012	0.0011	0.0064	0.0014	0.0009	0.006	0.001	0.0011	0.0009	0.002	0.0044	0.0102	0.0074	0.0067	0.0067	0.0068	0.0021	0.006	0.0016	0.0023	0.0017	0.0018	0.0017	0.0015	0.0024
UNMAPPED READS:
% of reads unmapped: too many mismatches |	0	0	0	0	0	0	0	0	0	0	0	0	0	0	0	0	0	0	0	0	0	0	0	0	0	0	0	0
% of reads unmapped: too short |	0.0919	0.0898	0.0909	0.0937	0.0923	0.1263	0.1053	0.0985	0.1243	0.0994	0.0983	0.0993	0.1026	0.0926	0.1056	0.1284	0.1307	0.1292	0.1288	0.1142	0.1305	0.0982	0.1013	0.0962	0.1062	0.1017	0.0955	0.1035
% of reads unmapped: other |	0.0006	0.0006	0.0007	0.0007	0.0007	0.0011	0.0007	0.0006	0.0012	0.0006	0.0007	0.0006	0.0007	0.0011	0.0016	0.0009	0.0014	0.0013	0.001	0.0009	0.0012	0.0007	0.0008	0.0009	0.0008	0.0009	0.0008	0.0008
CHIMERIC READS:
Number of chimeric reads |	0	0	0	0	0	0	0	0	0	0	0	0	0	0	0	0	0	0	0	0	0	0	0	0	0	0	0	0
% of chimeric reads |	0	0	0	0	0	0	0	0	0	0	0	0	0	0	0	0	0	0	0	0	0	0	0	0	0	0	0	0
